# Supplementary material for: Serum Creatinine Level and Its Relation to Backache in Chronic Kidney Disease with Unknown Aetiology (CKDu) Patients in North Central Province, Sri Lanka
Source: Preprints.org preprint supplement (doi:10.20944/preprints201809.0489.v1), 2018-09-25
Supplement: Supplementary file 1 [file supplementary]

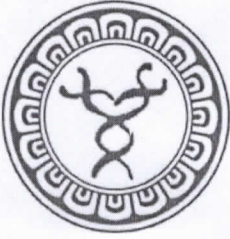

# INSTITUTE OF BIOLOGY SRI LANKA

(Incorporated by Act of Parliament No. 22 of 1984)

**Postal Address:**

The Institute of Biology,  
'Vidya Mandiraya',  
120/10, Wijerama Road,  
Colombo 07

22<sup>nd</sup> September 2016

**Web**

<http://www.iobsl.org/>

**Email**

[iobsl36th@gmail.com](mailto:iobsl36th@gmail.com)

**Committee 2015/2016**

**President:**

Dr. I. C. Perera  
077 785 1528

**Vice Presidents**

Dr. H. S. Kathriarachchi  
Dr. P. Saputhanthri  
Dr. A. J. Mohotti  
Prof. L. D. Amarasinghe

**Joint Secretaries**

Dr. B.D.R. Prasantha  
071 807 5686  
Dr. H.I.U. Caldera  
077 776 0321

**Secretary for International  
Relations**

Prof. H.S. Amarasekera

**Treasurer**

Dr. W.A.R.T.W. Bandara

**Assistant Treasurer**

Dr. N. Punchihewa

**Editor**

Dr. Gayani Galhena

**Assistant Editor**

Dr. Chandrika N. Perera

**Elected Members**

Prof. Wipula B. Yapa  
Prof. M.J.S. Wijeyaratne  
Dr. K. Mohotti  
Dr. P. N. Dassanayake  
Dr. J. Weerasena  
Dr. P. Ratnaweera

Dr. Nishantha Kumarasinghe  
Faculty of Medicine,  
General Sri John Kotelawala University  
Kandawala road  
Ratmalana.

Registration No: ERC IOBSL147 07 16

Date of Application: 12.07.2016

Dear Dr. Kumarasinghe,

**Decision of the ERC IOBSL**

The Ethical Review Committee of the Institute of Biology Sri Lanka (ERC IOBSL) at a meeting held on the 21<sup>st</sup> September 2016, decided to grant approval for your research project titled "**Study of biochemical parameters and their association with sociodemographic and biological characteristics of Sri Lankan Traditional Medicinal treatment method on chronic kidney disease of unknown origin patients living in Kebithigollewa**".

The approval of the Ethical Review Committee is valid only for the proposed duration from the date of this letter. Please note that this research project has to be completed within the proposed time frame and no changes should be made to the research project approved by the ERCIOBSL. If any change is required further approval of the IOBSL should be sought.

Thank you

Prof. M J S Wijeyaratne  
Chairman ERC IOBSL
